# Supplementary material
Source: publisher figshare collection journal article supplement (https://acs.figshare.com/ndownloader/files/7276004)
Supplement: Supplementary file 1 [file 7276004]

# Poly(ethylene glycol)-based coatings combining low-biofouling and quorum sensing inhibiting properties to reduce bacterial colonisation

*Berkay Ozcelik,<sup>1</sup> Kitty Ka Kit Ho,<sup>2</sup> Veronica Glattauer,<sup>1</sup> Mark Willcox,<sup>3</sup> Naresh Kumar,<sup>2</sup>  
Helmut Thissen<sup>1,\*</sup>*

<sup>1</sup>Commonwealth Scientific and Industrial Research Organisation (CSIRO), Clayton, VIC  
3168, Australia

<sup>2</sup>School of Chemistry, University of New South Wales, Sydney, NSW 2052, Australia

<sup>3</sup>School of Optometry and Vision Science, University of New South Wales, Sydney, NSW  
2052, Australia

Supplementary Figure S1 and Supplementary Figure S2

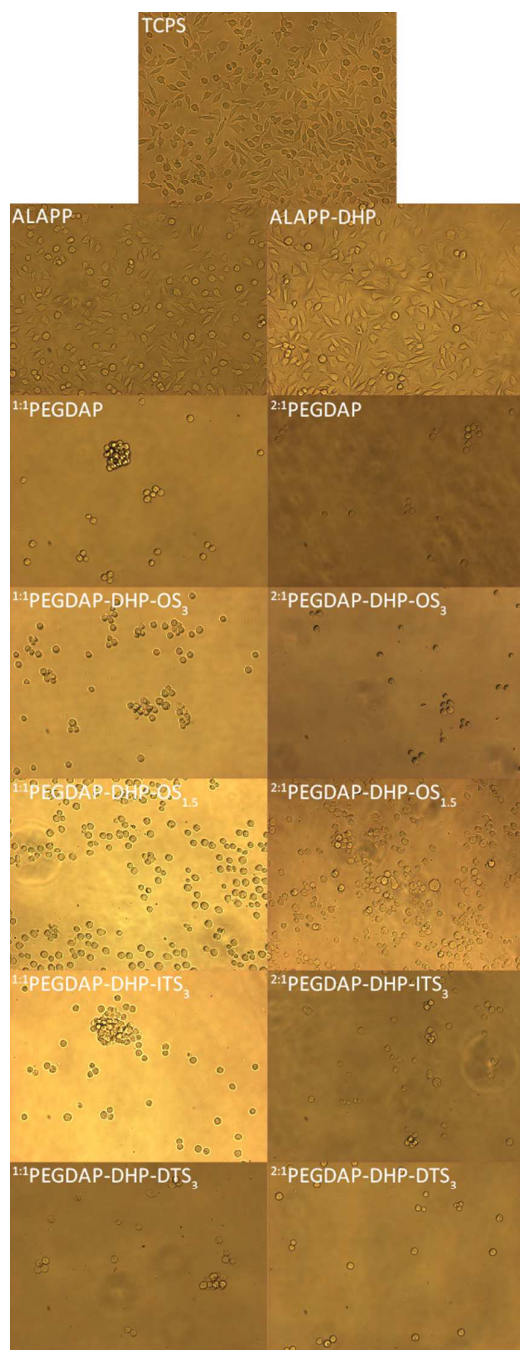

**Figure S1:** L929 fibroblast cell attachment on PEGDAP-DHP surfaces observed after 24 h by phase contrast microscopy compared with attachment on TCPS control surface. On none of the PEGDAP and PEGDAP-DHP surfaces, cell spreading was observed, indicating that DHP incorporation does not interfere with the low biofouling properties of the PEGDAP coating.

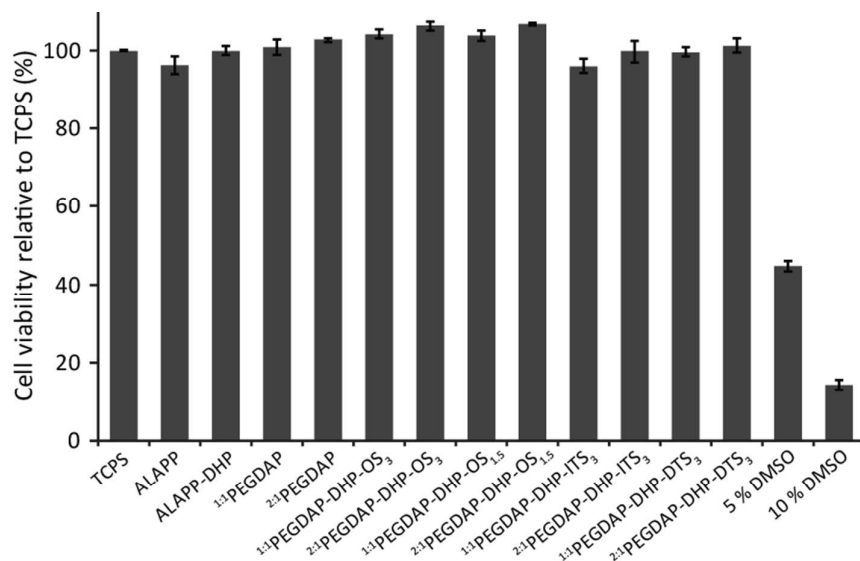

**Figure S2:** *In vitro* cell viability assessment of PEGDAP incubated medium samples. No reduction in cell viability was observed for any of the PEGDAP and PEGDAP-DHP coatings, while both 5 and 10 % DMSO controls showed significant cytotoxicity. Cytotoxicity assessment of materials was performed according to the International Standard ISO10993-5/12 and cell viability below 70 % was considered cytotoxic.
